# Supplementary material for: Identification of recombination hotspots and quantitative trait loci for recombination rate in layer chickens
Source: PubMed Central journal article supplement (PMC6390344; doi:10.1186/s40104-019-0332-y), 2019-02-26

# GRN in brown layers

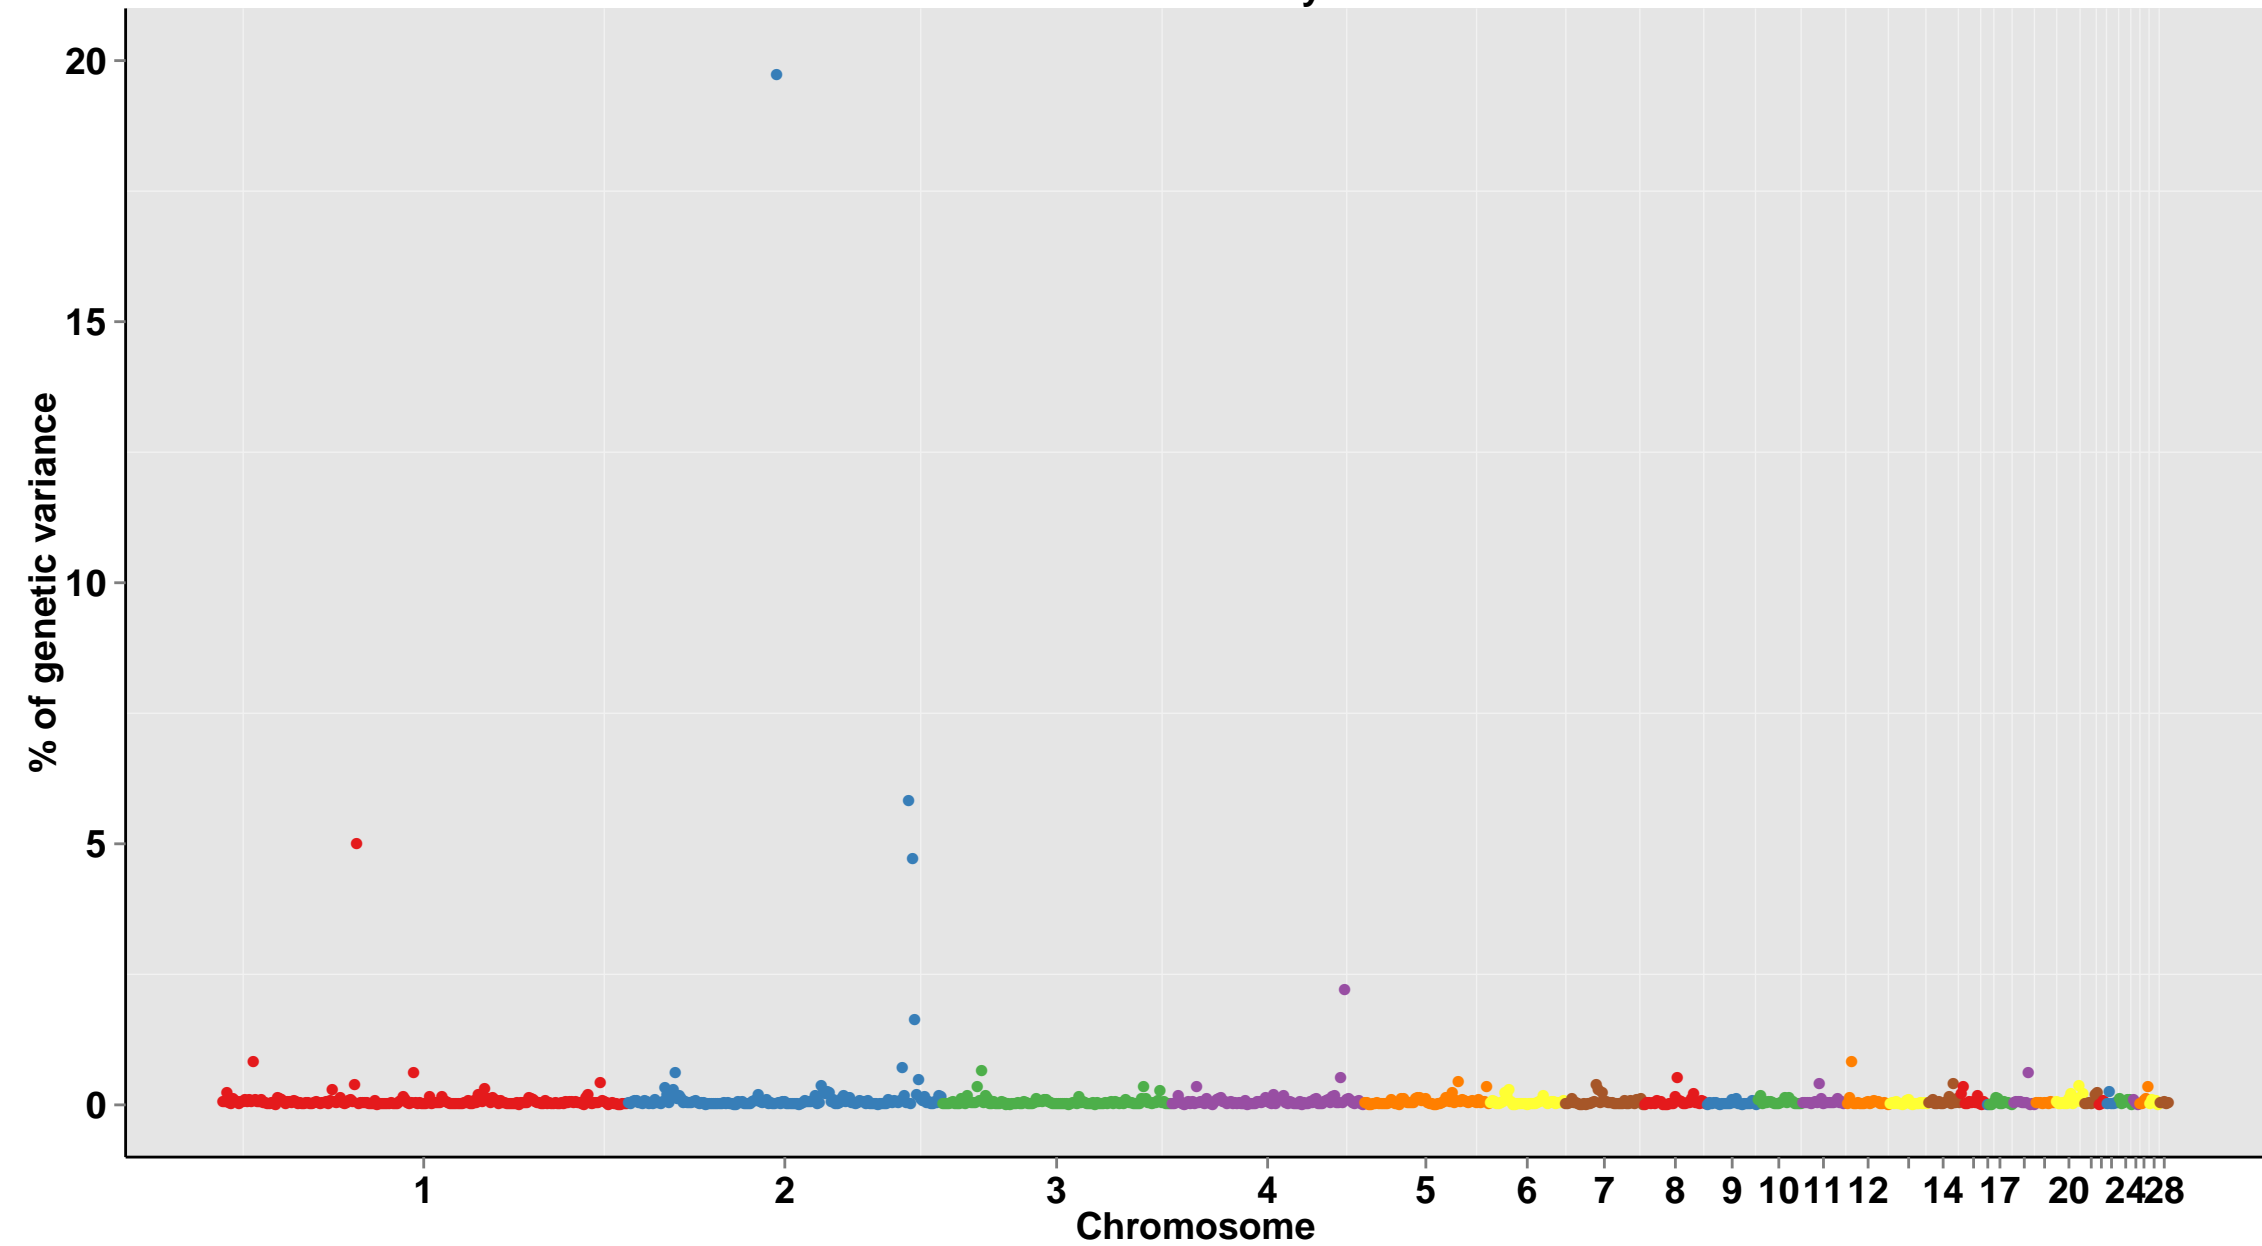

Supplement: 40104_2019_332_MOESM7_ESM.pdf [file 40104_2019_332_MOESM7_ESM.pdf]
